# Supplementary material
Source: ML conference proceedings conference paper supplement (https://www.ecva.net/papers/eccv_2020/papers_ECCV/html/123550715_ECCV_2020_paper.php)
Supplement: Supplementary file 2 [file 123550715-supp.zip]

# Supplementary Material: Large-Scale Few-Shot Learning via Multi-Modal Knowledge Discovery

Shuo Wang<sup>1,3</sup>, Jun Yue<sup>3</sup>, Jianzhuang Liu<sup>3</sup>, Qi Tian<sup>4</sup>, and Meng Wang<sup>1,2</sup>

<sup>1</sup> School of Computer Science and Information Engineering,  
Hefei University of Technology

<sup>2</sup> Institute of Artificial Intelligence, Hefei Comprehensive National Science Center

<sup>3</sup> Noah's Ark Lab, Huawei Technologies

<sup>4</sup> Huawei Cloud BU

## 1 Visual Knowledge Discovery

In this section, we provide more visual responsive results from the three independent CNNs,  $\Omega_o$ ,  $\Omega_f$ , and  $\Omega_b$ . As shown in Fig. A(a), for many base samples, such as “Mousetrap”, “Hamster”, “Balloon”, “French Horn”, “Drake”, “Acoustic Guitar”, “Tricycle”, and “Radio Telescope”, it is easy to see that  $\Omega_o$  and  $\Omega_f$  focus on the regions of the objects, and  $\Omega_b$  concentrates on the bodies or edges of these objects. By the way, in the “Acoustic Guitar” image,  $\Omega_b$  can find more guitars with their shapes in the background. On the other hand, these CNNs perform differently on many novel samples as shown in Fig. A(b) and Fig. A(c). For the novel samples in Fig. A(b), the responses of  $\Omega_o$  are deviated from the objects like “Scuba Diver”, “Beigel”, “Palace”, “Mailbox”, “Goblet”, “Cicada”, “Basketball”, and “Pencil Sharpener”. When  $\Omega_f$  is used, we can see that the responses on these instances are shifted to the bodies of the objects. Then we show the importance of  $\Omega_b$  in Fig. A(c). For many other novel samples, such as “Cassette”, “Valley”, “Parachute”, “Space Heater”, “Marimba”, “Radiator”, “Microwave Oven”, and “Home Theater” images, the objects may be segmented as the backgrounds by the unsupervised saliency detection [4]. Thus,  $\Omega_b$  is necessary to extract useful features from the backgrounds in these cases. It is worth mentioning that, as shown in Fig. A(b), for the objects “Palace”, “Mailbox”, “Basketball”, and “Pencil Sharpener”, the responses of both  $\Omega_f$  and  $\Omega_b$  are useful to describe the objects.

## 2 Textual Knowledge Discovery

In this section, we list more examples of the results by the network with the textual knowledge discovery (denoted as “ $\mathcal{L}_{CE} + \mathcal{L}_{Semantic}$ ”) and the network without it (denoted as “ $\mathcal{L}_{CE}$  Only”) in Fig. B. Compared with the predictions of “ $\mathcal{L}_{CE}$  Only”, the predicted results of “ $\mathcal{L}_{CE} + \mathcal{L}_{Semantic}$ ” are more relevant to the input objects. For example, when the input novel image is a kind of car (“Tow



| Novel Samples                                                                                            | Method                                      | Top 1                                                                                                    | Top 2                                                                                                  | Top 3                                                                                                     | Top 4                                                                                                    | Top 5                                                                                                   | Top 6                                                                                                      | Top 7                                                                                                        |
|----------------------------------------------------------------------------------------------------------|---------------------------------------------|----------------------------------------------------------------------------------------------------------|--------------------------------------------------------------------------------------------------------|-----------------------------------------------------------------------------------------------------------|----------------------------------------------------------------------------------------------------------|---------------------------------------------------------------------------------------------------------|------------------------------------------------------------------------------------------------------------|--------------------------------------------------------------------------------------------------------------|
| <br>Tow Truck           | $\mathcal{L}_{CE} + \mathcal{L}_{Semantic}$ | <br>Tow Truck           | <br>Police Van        | <br>Passenger Car        | <br>Trolleybus          | <br>Police Van        | <br>Fountain            | <br>Catamaran             |
|                                                                                                          | $\mathcal{L}_{CE}$ Only                     | <br>Police Van          | <br>Trolleybus        | <br>Catamaran            | <br>Fountain            | <br>Bobsled           | <br>Drum                | <br>Tow Truck             |
| <br>Electric Guitar     | $\mathcal{L}_{CE} + \mathcal{L}_{Semantic}$ | <br>Electric Guitar     | <br>Banjo             | <br>Accordion            | <br>Fountain Pen        | <br>Projector         | <br>Cornet              | <br>Jersey                |
|                                                                                                          | $\mathcal{L}_{CE}$ Only                     | <br>Bikini              | <br>Projector         | <br>Fountain Pen         | <br>Swing               | <br>Jersey            | <br>Accordion           | <br>Doomat                |
| <br>Labrador Retriever  | $\mathcal{L}_{CE} + \mathcal{L}_{Semantic}$ | <br>Labrador Retriever  | <br>Chesapeake Dog    | <br>Kuvasz               | <br>Weimaraner          | <br>Pug               | <br>Samoyed             | <br>Paper Towel           |
|                                                                                                          | $\mathcal{L}_{CE}$ Only                     | <br>Paper Towel         | <br>Chesapeake Dog    | <br>Pembroke             | <br>Lion                | <br>Red Wolf          | <br>Oxcart              | <br>Labrador Retriever    |
| <br>Cornet              | $\mathcal{L}_{CE} + \mathcal{L}_{Semantic}$ | <br>Cornet              | <br>Banjo             | <br>Ladle                | <br>Swing               | <br>Maypole           | <br>Accordion           | <br>Barbell               |
|                                                                                                          | $\mathcal{L}_{CE}$ Only                     | <br>Swing               | <br>Banjo             | <br>Maypole              | <br>Totem Pole          | <br>Barbell           | <br>Bow                 | <br>Ladle                 |
| <br>Fire Salamander    | $\mathcal{L}_{CE} + \mathcal{L}_{Semantic}$ | <br>Fire Salamander     | <br>Tailed Frog       | <br>Eft                  | <br>Snail               | <br>Spiny Lobster     | <br>Tree Frog           | <br>Ringneck Snake        |
|                                                                                                          | $\mathcal{L}_{CE}$ Only                     | <br>Spiny Lobster     | <br>Gila Monster    | <br>Tailed Frog        | <br>Snail             | <br>Eft             | <br>Fire Salamander   | <br>Pineapple           |
| <br>Yorkshire Terrier | $\mathcal{L}_{CE} + \mathcal{L}_{Semantic}$ | <br>Yorkshire Terrier | <br>Norwich Terrier | <br>Standard Schnauzer | <br>Giant Schnauzer   | <br>Irish Terrier   | <br>Wheaton Terrier   | <br>African Hunting Dog |
|                                                                                                          | $\mathcal{L}_{CE}$ Only                     | <br>Paper Towel       | <br>Tarantula       | <br>Standard Schnauzer | <br>Otter             | <br>Norwich Terrier | <br>Yorkshire Terrier | <br>Irish Terrier       |
| <br>Ptarmigan         | $\mathcal{L}_{CE} + \mathcal{L}_{Semantic}$ | <br>Ptarmigan         | <br>Limppkin        | <br>Oystercatcher      | <br>Ant               | <br>Horizontal Bar  | <br>Cock              | <br>Bustard             |
|                                                                                                          | $\mathcal{L}_{CE}$ Only                     | <br>Ant               | <br>Bonnet          | <br>Gong               | <br>Teddy             | <br>Horizontal Bar  | <br>Monarch           | <br>Swing               |
| <br>Cornet            | $\mathcal{L}_{CE} + \mathcal{L}_{Semantic}$ | <br>Cornet            | <br>Banjo           | <br>Accordion          | <br>Ladle             | <br>Swing           | <br>Electric Guitar   | <br>Violin              |
|                                                                                                          | $\mathcal{L}_{CE}$ Only                     | <br>Accordion         | <br>Swing           | <br>Banjo              | <br>Shower Cap        | <br>Horizontal Bar  | <br>Cornet            | <br>Jersey              |
| <br>Ant               | $\mathcal{L}_{CE} + \mathcal{L}_{Semantic}$ | <br>Ant               | <br>Monarch         | <br>Fly                | <br>Cabbage Butterfly | <br>Lycenid         | <br>Hip               | <br>Cricket             |
|                                                                                                          | $\mathcal{L}_{CE}$ Only                     | <br>Bell Pepper       | <br>Hip             | <br>Monarch            | <br>Spiny Lobster     | <br>Fly             | <br>Lycenid           | <br>Broccoli            |

**Fig.B.** The recognition results of several novel samples by the networks with and without the textual knowledge discovery, denoted as “ $\mathcal{L}_{CE} + \mathcal{L}_{Semantic}$ ” and “ $\mathcal{L}_{CE}$  Only”, respectively. In this experiment,  $K = 1$ . We randomly select one image from each label category for easy understanding of the objects corresponding to the labels.

Truck” here), all the top 5 results by “ $\mathcal{L}_{\text{CE}} + \mathcal{L}_{\text{Semantic}}$ ” are car labels. Although the 6<sup>th</sup> and the 7<sup>th</sup> results (“Fountain” and “Catamaran”) by “ $\mathcal{L}_{\text{CE}} + \mathcal{L}_{\text{Semantic}}$ ” are not relevant, its overall ranking of the top 7 results is better than that by “ $\mathcal{L}_{\text{CE}}$  Only”.

## References

1. Hariharan, B., Girshick, R.: Low-shot visual recognition by shrinking and hallucinating features. In: ICCV (2017)
2. He, K., Zhang, X., Ren, S., Sun, J.: Deep residual learning for image recognition. In: CVPR (2016)
3. Selvaraju, R.R., Cogswell, M., Das, A., Vedantam, R., Parikh, D., Batra, D.: Grad-cam: Visual explanations from deep networks via gradient-based localization. In: ICCV (2017)
4. Zhang, J., Zhang, T., Dai, Y., Harandi, M., Hartley, R.: Deep unsupervised saliency detection: A multiple noisy labeling perspective. In: CVPR (2018)
