# Supplementary material
Source: ML conference proceedings conference paper supplement (https://www.ecva.net/papers/eccv_2020/papers_ECCV/html/123550715_ECCV_2020_paper.php)
Supplement: Supplementary file 4 [file 123550715-supp.zip]

| Novel Samples | Label        | Input Image                                                                         | Original Response from $\Omega_o$                                                    | Foreground Response from $\Omega_f$                                                   | Background Response from $\Omega_b$                                                   | Label          | Input Image                                                                           | Original Response from $\Omega_o$                                                     | Foreground Response from $\Omega_f$                                                   | Background Response from $\Omega_b$                                                   |
|---------------|--------------|-------------------------------------------------------------------------------------|--------------------------------------------------------------------------------------|---------------------------------------------------------------------------------------|---------------------------------------------------------------------------------------|----------------|---------------------------------------------------------------------------------------|---------------------------------------------------------------------------------------|---------------------------------------------------------------------------------------|---------------------------------------------------------------------------------------|
|               | Cassette     |    |    |    |    | Marimba        |    |    |    |    |
|               | Valley       |    |    |    |    | Radiator       |    |    |    |    |
|               | Parachute    |   |   |   |   | Microwave Oven |   |   |   |   |
|               | Space Heater |  |  |  |  | Home Theater   |  |  |  |  |
