# Supplementary material
Source: ML conference proceedings conference paper supplement (https://www.ecva.net/papers/eccv_2020/papers_ECCV/html/123550715_ECCV_2020_paper.php)
Supplement: Supplementary file 5 [file 123550715-supp.zip]

| Novel Samples                                                                                           | Method                                      | Top 1                                                                                                    | Top 2                                                                                                  | Top 3                                                                                                       | Top 4                                                                                                      | Top 5                                                                                                    | Top 6                                                                                                      | Top 7                                                                                                        |
|---------------------------------------------------------------------------------------------------------|---------------------------------------------|----------------------------------------------------------------------------------------------------------|--------------------------------------------------------------------------------------------------------|-------------------------------------------------------------------------------------------------------------|------------------------------------------------------------------------------------------------------------|----------------------------------------------------------------------------------------------------------|------------------------------------------------------------------------------------------------------------|--------------------------------------------------------------------------------------------------------------|
| 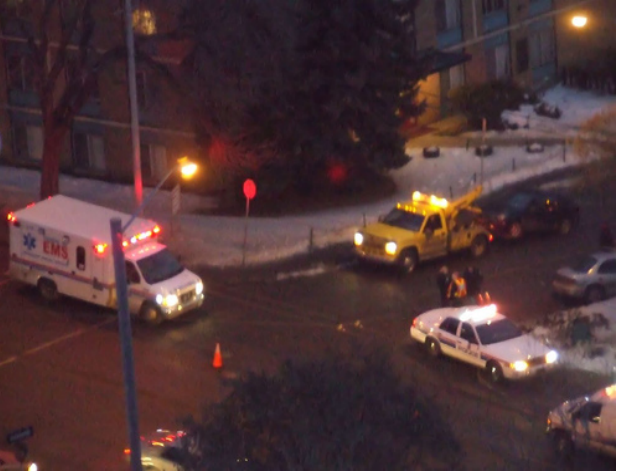<br>Tow Truck           | $\mathcal{L}_{CE} + \mathcal{L}_{Semantic}$ | <br>Tow Truck            | <br>Police Van         | <br>Passenger Car         | <br>Trolleybus           | <br>Police Van         | <br>Fountain             | <br>Catamaran              |
|                                                                                                         | $\mathcal{L}_{CE}$ Only                     | <br>Police Van          | <br>Trolleybus        | <br>Catamaran            | <br>Fountain            | <br>Bobsled           | <br>Drum                | <br>Tow Truck             |
| <br>Electric Guitar     | $\mathcal{L}_{CE} + \mathcal{L}_{Semantic}$ | <br>Electric Guitar     | <br>Banjo             | <br>Accordion            | <br>Fountain Pen        | <br>Projector         | <br>Cornet              | <br>Jersey                |
|                                                                                                         | $\mathcal{L}_{CE}$ Only                     | <br>Bikini              | <br>Projector         | <br>Fountain Pen         | <br>Swing               | <br>Jersey            | <br>Accordion           | <br>Doormat               |
| <br>Labrador Retriever  | $\mathcal{L}_{CE} + \mathcal{L}_{Semantic}$ | <br>Labrador Retriever  | <br>Chesapeake Dog    | <br>Kuvasz               | <br>Weimaraner          | <br>Pug               | <br>Samoyed             | <br>Paper Towel           |
|                                                                                                         | $\mathcal{L}_{CE}$ Only                     | <br>Paper Towel         | <br>Chesapeake Dog    | <br>Pembroke             | <br>Lion                | <br>Red Wolf          | <br>Oxcart              | <br>Labrador Retriever    |
| <br>Cornet            | $\mathcal{L}_{CE} + \mathcal{L}_{Semantic}$ | <br>Cornet            | <br>Banjo           | <br>Ladle              | <br>Swing             | <br>Maypole         | <br>Accordion         | <br>Barbell             |
|                                                                                                         | $\mathcal{L}_{CE}$ Only                     | <br>Swing             | <br>Banjo           | <br>Maypole            | <br>Totem Pole        | <br>Barbell         | <br>Bow               | <br>Ladle               |
| <br>Fire Salamander   | $\mathcal{L}_{CE} + \mathcal{L}_{Semantic}$ | <br>Fire Salamander   | <br>Tailed Frog     | <br>Eft                | <br>Snail             | <br>Spiny Lobster   | <br>Tree Frog         | <br>Ringneck Snake      |
|                                                                                                         | $\mathcal{L}_{CE}$ Only                     | <br>Spiny Lobster     | <br>Gila Monster    | <br>Tailed Frog        | <br>Snail             | <br>Eft             | <br>Fire Salamander   | <br>Pineapple           |
| <br>Yorkshire Terrier | $\mathcal{L}_{CE} + \mathcal{L}_{Semantic}$ | <br>Yorkshire Terrier | <br>Norwich Terrier | <br>Standard Schnauzer | <br>Giant Schnauzer   | <br>Irish Terrier   | <br>Wheaten Terrier   | <br>African Hunting Dog |
|                                                                                                         | $\mathcal{L}_{CE}$ Only                     | <br>Paper Towel       | <br>Tarantula       | <br>Standard Schnauzer | <br>Otter             | <br>Norwich Terrier | <br>Yorkshire Terrier | <br>Irish Terrier       |
| <br>Ptarmigan         | $\mathcal{L}_{CE} + \mathcal{L}_{Semantic}$ | <br>Ptarmigan         | <br>Limpkin         | <br>Oystercatcher      | <br>Ant               | <br>Horizontal Bar  | <br>Cock              | <br>Bustard             |
|                                                                                                         | $\mathcal{L}_{CE}$ Only                     | <br>Ant               | <br>Bonnet          | <br>Gong               | <br>Teddy             | <br>Horizontal Bar  | <br>Monarch           | <br>Swing               |
| <br>Cornet            | $\mathcal{L}_{CE} + \mathcal{L}_{Semantic}$ | <br>Cornet            | <br>Banjo           | <br>Accordion          | <br>Ladle             | <br>Swing           | <br>Electric Guitar   | <br>Violin              |
|                                                                                                         | $\mathcal{L}_{CE}$ Only                     | <br>Accordion         | <br>Swing           | <br>Banjo              | <br>Shower Cap        | <br>Horizontal Bar  | <br>Cornet            | <br>Jersey              |
| <br>Ant               | $\mathcal{L}_{CE} + \mathcal{L}_{Semantic}$ | <br>Ant               | <br>Monarch         | <br>Fly                | <br>Cabbage Butterfly | <br>Lycaenid        | <br>Hip               | <br>Cricket             |
|                                                                                                         | $\mathcal{L}_{CE}$ Only                     | <br>Bell Pepper       | <br>Hip             | <br>Monarch            | <br>Spiny Lobster     | <br>Fly             | <br>Lycaenid          | <br>Broccoli            |
