# Supplementary material
Source: ML conference proceedings conference paper supplement (https://www.ecva.net/papers/eccv_2020/papers_ECCV/html/123550715_ECCV_2020_paper.php)
Supplement: Supplementary file 6 [file 123550715-supp.zip]

| Base Samples | Label       | Input Image                                                                         | Original Response from $\Omega_o$                                                    | Foreground Response from $\Omega_f$                                                   | Background Response from $\Omega_b$                                                   | Label           | Input Image                                                                           | Original Response from $\Omega_o$                                                     | Foreground Response from $\Omega_f$                                                   | Background Response from $\Omega_b$                                                   |
|--------------|-------------|-------------------------------------------------------------------------------------|--------------------------------------------------------------------------------------|---------------------------------------------------------------------------------------|---------------------------------------------------------------------------------------|-----------------|---------------------------------------------------------------------------------------|---------------------------------------------------------------------------------------|---------------------------------------------------------------------------------------|---------------------------------------------------------------------------------------|
|              | Mousetrap   | 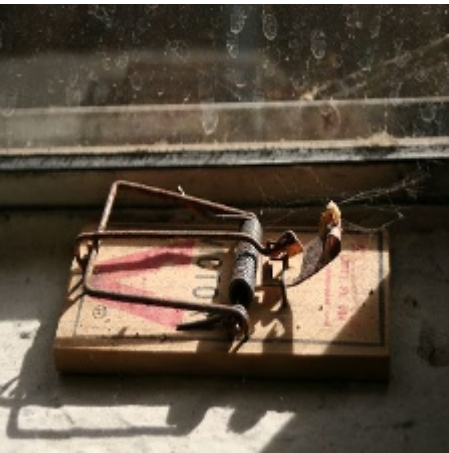   |    |    |    | Drake           |    |    |    |    |
|              | Hamster     |    |    |    |    | Acoustic Guitar |    |    |    |    |
|              | Balloon     |   |   |   |   | Tricycle        |   |   |   |   |
|              | French Horn |  |  |  |  | Radio Telescope |  |  |  |  |
