# Supplementary material
Source: ML conference proceedings conference paper supplement (https://www.ecva.net/papers/eccv_2020/papers_ECCV/html/123550715_ECCV_2020_paper.php)
Supplement: Supplementary file 9 [file 123550715-supp.zip]

|                         |                 | Original<br>Response<br>from $\Omega_o$                                             | Foreground<br>Response<br>from $\Omega_f$                                           | Background<br>Response<br>from $\Omega_b$                                           |                                                                                      |                     | Original<br>Response<br>from $\Omega_o$                                               | Foreground<br>Response<br>from $\Omega_f$                                             | Background<br>Response<br>from $\Omega_b$                                             |                                                                                       |
|-------------------------|-----------------|-------------------------------------------------------------------------------------|-------------------------------------------------------------------------------------|-------------------------------------------------------------------------------------|--------------------------------------------------------------------------------------|---------------------|---------------------------------------------------------------------------------------|---------------------------------------------------------------------------------------|---------------------------------------------------------------------------------------|---------------------------------------------------------------------------------------|
| Label                   | Input<br>Image  |                                                                                     |                                                                                     |                                                                                     | Label                                                                                | Input<br>Image      |                                                                                       |                                                                                       |                                                                                       |                                                                                       |
| (a)<br>Base<br>Samples  | Mousetrap       | 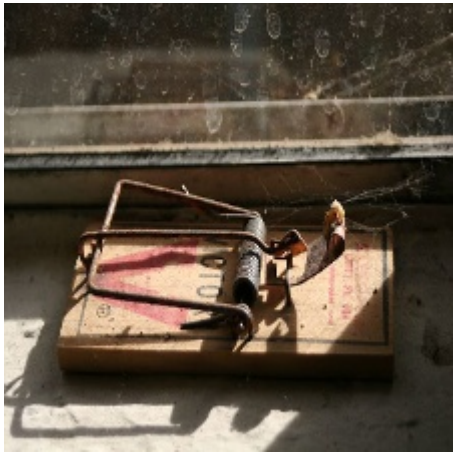   |    |    |    | Drake               |    |    |    |    |
|                         | Hamster         |    |    |    |    | Acoustic<br>Guitar  |    |    |    |    |
|                         | Balloon         |    |    |    |    | Tricycle            |    |    |    |    |
|                         | French<br>Horn  |   |   |   |   | Radio<br>Telescope  |   |   |   |   |
| (b)<br>Novel<br>Samples | Scuba<br>Diver  |  |  |  |  | Goblet              |  |  |  |  |
|                         | Beigel          |  |  |  |  | Cicada              |  |  |  |  |
|                         | Palace          |  |  |  |  | Basketball          |  |  |  |  |
|                         | Mailbox         |  |  |  |  | Pencil<br>Sharpener |  |  |  |  |
| (c)<br>Novel<br>Samples | Cassette        |  |  |  |  | Marimba             |  |  |  |  |
|                         | Valley          |  |  |  |  | Radiator            |  |  |  |  |
|                         | Parachute       |  |  |  |  | Microwave<br>Oven   |  |  |  |  |
|                         | Space<br>Heater |  |  |  |  | Home<br>Theater     |  |  |  |  |
