# Supplementary material
Source: ML conference proceedings conference paper supplement (https://www.ecva.net/papers/eccv_2020/papers_ECCV/html/123550715_ECCV_2020_paper.php)
Supplement: Supplementary file 10 [file 123550715-supp.zip]

| Novel Samples | Label       | Input Image                                                                         | Original Response from $\Omega_o$                                                    | Foreground Response from $\Omega_f$                                                   | Background Response from $\Omega_b$                                                   | Label            | Input Image                                                                           | Original Response from $\Omega_o$                                                     | Foreground Response from $\Omega_f$                                                   | Background Response from $\Omega_b$                                                   |
|---------------|-------------|-------------------------------------------------------------------------------------|--------------------------------------------------------------------------------------|---------------------------------------------------------------------------------------|---------------------------------------------------------------------------------------|------------------|---------------------------------------------------------------------------------------|---------------------------------------------------------------------------------------|---------------------------------------------------------------------------------------|---------------------------------------------------------------------------------------|
|               | Scuba Diver | 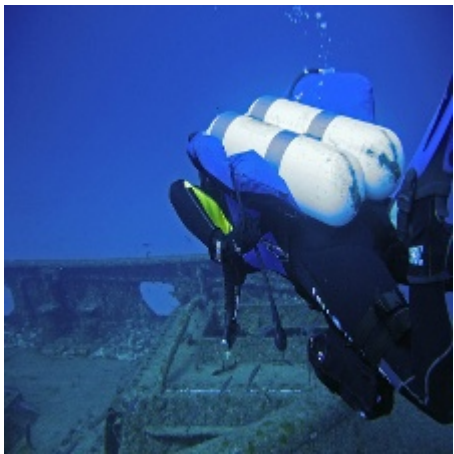   |    |    |    | Goblet           |    |    |    |    |
|               | Beigel      |    |    |    |    | Cicada           |    |    |    |    |
|               | Palace      |   |   |   |   | Basketball       |   |   |   |   |
|               | Mailbox     |  |  |  |  | Pencil Sharpener |  |  |  |  |
